# Supplementary material for: Electro-Osmotic Flow of Water–Methanol Mixtures Through Nafion Membranes Revisited: Composition and Temperature Dependence
Source: Frontiers journal article supplement (doi:10.3389/fenrg.2022.855333), 2022-03-24
Supplement: Data_Sheet_1.docx [file Data_Sheet_1.docx]

**Supplementary Information for**

Electro-osmotic coefficients of water-methanol mixtures through Nafion membranes revisited: Composition and temperature dependence

**Horacio R. Corti,a* and Liliana Trevanib**

aDepartamento de Física de la Materia Condensada e Instituto de Nanociencia y Nanotecnologia (CNEA-CONICET), Comisión Nacional de Energía Atómica, Avda. General Paz 1499, San Martín B1650KNA, Buenos Aires, Argentina.

bFaculty of Science, Ontario Tech University, Oshawa, 2000 Simcoe St. North, Oshawa (L1H 7K4), Ontario, Canada.

**S1. Volume correction**

According to Eqns. (5) and (6) of the main text, the cathodic and anodic correction to the measured volumes can be estimated by resorting to volumetric properties of the solid Ag and AgCl and the HCl solution. The data for the partial molar volume of HCl is available for aqueous solutions but not for the methanol-water and pure methanol solutions.

Table S1 summarizes the data for the molar volume of the solids and the partial molar volume of HCl in pure water as a function of temperature, along with the volume correction calculated for a total charge of ~ 10 coulombs, which is the upper limit for the charges used in our measurements. that have opposite signs for the cathodic (positive) and anodic (negative) sides.

**Table S1:** Molar volumes of Ag(s),1 AgCl(s),2 apparent partial molar volume of HCl (aq),3 and volume correction for a charge of 10 coulombs, as a function of temperature

|  | **25 oC** | **40 oC** | **50 oC** | **60 oC** |
| --- | --- | --- | --- | --- |
| Ag (s) (cm3.mol-1) | 10.27 | 10.28 | 10.29 | 10.29 |
| AgCl (s) (cm3.mol-1) | 25.77 | 25.77 | 25.77 | 25.77 |
| *V*HCl (aq) (cm3.mol-1) | 18.27 | 18.68 | 18.74 | 18.64 |
| Δ*V* (cm3) | 0.00028 | 0.00032 | 0.00033 | 0.00032 |

The volume changes measured on the cathodic and anodic sides of the cell were in the range 0.006-0.012 cm3 for charges that reached a maximum of 0.5.10-4 F (≈ 5 coulombs). Thus, the correction never exceeds 2-3% of the measured volume change, within the experimental error. We have adopted the values for pure water to correct the measured volumes in methanol-water mixtures with the criteria that these corrections are close to the experimental error of the measurements.

The following figure shows a typical example of an electro-osmotic experiment for a solution at 40 oC with *x*m = 0.44 and HCl concentration 0.50 mol.kg-1. The current during the measurements was *I*= 0.6 mA

**Figure S1:** Electroosmotic experiment corresponding to a solution *x*m = 0.44 at 40 oC. The results correspond to a duplicate run (circles and triangles) and the changes of position of the solution in the capillary tube as a function of time for the cathodic and anodic sides of the cell.

**S2. Electro-osmotic drag coefficient of water in Nafion membranes**

Table S2 summarizes the measured electro-osmotic drag coefficients of water through Nafion membranes of different types, indicating the range of temperature and water content explored and the media in contact with the membrane.

**Table S2.** Electro-osmotic drag coefficient (**ξ)** of water in Nafion membranes

| **Membrane** | **Methoda** | **Media** | **T (K)** | **λ** | **ξH2O** | **Ref.** |
| --- | --- | --- | --- | --- | --- | --- |
| 117 | WAGC | vapor | 298 | 1-14 | 0.2-1.4 | 4 |
| 117 | WAGC | vapor | 303 | 1.4-14 | 1.0 | 5 |
| 112 | WAGC | vapor | 248-263 | 7-11 | 1.0 | 6 |
| 117 | WAGC | vapor | 296.5 | 29 | 0.99 | 7 |
| 112 | WAGC | vapor + H2 | 333-353 | 0.15-0.75b | 0.7-1.1 | 8 |
| 117 | H2MEAH2 | vapor | 398 | 0.05-0.38b | 0.2-0.7 | 9 |
| 117 | H2MEAH2 | Vapor  liquid | 303-353  288-358 | 2-12  16.8 | 0.34-1.1  1.8-2.7 | 10 |
| 112, NRE212 | HP | liquid | 298-353 | 1.5-8 | 0.1- 1.1 | 11 |
| 117 | HP | liquid | 293-363  298 | 22.5  12-18 | 2.0-3.4  1.2-2.0 | 12 |
| 117 | DMFC | liquid + O2 | 288-403 | 22 | 2.0-5.1 | 13 |
| 117 | DMFC | liquid + O2 | 288-383 |  | 2.3-5.2 | 14 |
| 117 | RTC | liquid | 295 |  | 3.2-8.0 | 15 |
| 117 | SPC | 0.003 – 1 M HCl | RT |  | 2.4-2.8 | 16 |
| 117 | eNMR | pure water | 296-353 | 11-20 | 1.7-2.8 | 17 |
| 115 | PEME | water + H2 and HCl (g) | 333-353 |  | 3.5-3.8 | 18 |
| 117 | TCCC | pure water | 303 | 22 | 2.5-2.9 | 19,20 |
| unknown | TCCC | 0.1 M HCl | 298 | 12-39 | 1.7-6.0 | 21 |
| 117 (K+-form) | TCCC | 0.01 M KCl | 298 |  | 9.2 | 22 |
| 117 | TCCC | - 1. -1 M HCl   0.01-1 M H2SO4  0.01-1 M H3PO4 | unknown |  | 2.8-7.1  3.0-6.1  2.2-3.8 | 23 |
| NRE-212 | TCCC | HNO3 (pH= 2.1 -5.1)  KOH (pH=11.9) | unknown |  | 5.5-6  27 | 24 |

aWAGC: Water activity gradient cell; H2MEAH2: Single Nafion MEA with H2 on both sides; HP: hydrogen pump; RTC: radiotracer transport cell; SPC: streaming potential cell; eNMR: electrophoretic NMR; PEME: PEM electrolyzer; TCCC: two compartments capillary cell.

bwater activity. RT: room temperature.

**References**

1. Abdullaev, R. N., Khairulin, R. A., and Stankus, S. V (2020). Density and thermal expansion of silver in the solid and liquid states. [J. Phys.: Conference Series, 1677,](https://iopscience.iop.org/journal/1742-6596) [XXXVI Siberian Thermophysical Seminar, 5-7](https://iopscience.iop.org/issue/1742-6596/1677/1)

2. Fouchaux, R. D., and Simmons R.O. (1964). Measurements of thermal expansion and the equilibrium defects in silver chloride. Phys. Rev. 136, 1664-1674.

3. [Åkerlöf](https://pubs.acs.org/action/doSearch?field1=Contrib&text1=G%C3%B6sta++%C3%85kerl%C3%B6f), G.,and Teare, J. (1938). A Note on the density of aqueous solutions of hydrochloric acid. J. Am. Chem. Soc*.*60, 1226–1228.

4. Fuller, T. F., and Newman, J. (1992). Experimental determination of the transport number of water in Nafion 117 membrane. J. Electrochem. Soc. 139, 1332-1337.

5. Zawodzinski, T. A., Davey, J., Valerio, J., and Gottesfeld, S. (1995). [The water content dependence of electro-osmotic drag in proton-conducting polymer electrolytes](http://www.sciencedirect.com/science/article/pii/0013468694002778). Electrochim. Acta 40, 297-302.

6. Gallagher, K. G., Pivovar, B. S., and Fuller, T. F. (2009). Electroosmosis and water uptake in polymer electrolytes in equilibrium with water vapor at low temperatures. J. Electrochem. Soc. 156, B330-B338.

7. Wang, X., McClure, J. P., and Fedkiw, P. S. (2012). Transport properties of proton- and hydroxide-exchange membranes for fuel cells. Electrochim. Acta 79, 126-132.

8. Jinnouchi, R., Yamada, H., and Morimoto, Y. (2005). Measurement of Electro-osmotic drag coefficient of Nafion using a concentration cell. In Water, Steam, and Aqueous Solutions for Electric Power. – Advances in Science and Technology. Proceedings of the 14th International Conference on the Properties of Water and Steam. Eds: M. Nakahara, N. Matubayasi, M. Ueno, K. Yasuoka, K. Watanabe, Maruzen Co., 403-406.

9. Weng, D., Wainright, J. S., Landau, U., and Savinell, R. F. (1996). Electro‐osmotic drag coefficient of water and methanol in polymer electrolytes at elevated temperatures. J. Electrochem. Soc. 143, 1260-1263.

10. Ge, S., Yi, B., and Ming, P. (2006). Experimental determination of electro-osmotic drag coefficient in Nafion membrane for fuel cells. J. Electrochem. Soc. 153, A1443-A1450.

11. Peng, Z., Morin, A., Huguet, P. Schott, P., and Pauchet, J. (2011). In-situ measurement of electro-osmotic drag coefficient in Nafion membrane for the PEMFC. J. Phys. Chem. B 115, 12835-12844.

12. Luo, Z., Chang, Z., Zhang, Y., Liu, Z., and Li, J. (2010). Electro-osmotic drag coefficient and proton conductivity in Nafion membrane for PEMFC. Int. J. Hydrogen Energy 35 (2010) 3120-3124.

13. Ren, X., Henderson, W., and Gottesfeld, S. (1997). Electro-osmotic drag of water in ionomeric membranes. J. Electrochem. Soc. 144, L267-L270.

14. Ren, X., and Gottesfeld, S. (2001). Electro-osmotic drag of water in poly(perfluorosulfonic acid) membranes. J. Electrochem. Soc. 148, A87-A93

15. Verbrugge, M. W., and Hill, R. F. (1990). Transport phenomena in perfluorosulfonic acid membranes during the passage of current. J. Electrochem. Soc., 137, 1131-1138.

16. Xie, G., and Okada, T. (1995). Water transport behavior in Nafion 117 membranes. J. Electrochem. Soc. 142, 3057-3062.

17. Ise, M, Kreuer, K. D. and Maier, J. (1999). Electro-osmotic drag in polymer electrolyte membranes: an electrophoretic NMR study. Solid State Ionics 125, 213-223.

18. Motupally, S., Becker, A. J, and Weidner, J. W. (2002). Water transport in polymer electrolyte membrane electrolyzers used to recycle anhydrous HCl: I. Characterization of diffusion and electro-osmotic drag. J. Electrochem. Soc.149, D63-D71.

19. Zawodzinski, T. A., Derouin, C., Radzinski, S., Sherman,R. J., Smith, V. T., Springer, T. E., et al (1993). Water uptake by and transport through Nafion® 117 membranes. J. Electrochem. Soc.140, 1041-1047.

#### 20. Zawodzinski, T. A., Springer,T. E., Davey, J., Jestel, R., Lopez, C., Valerio, J., et al. (1993). A comparative study of water uptake by and transport through ionomeric fuel cell membranes. J. Electrochem. Soc. 140, 1981-1885.

# 21. Meier, F., and Eigenberger, G. (2004). Transport parameters for the modelling of water transport in ionomer membranes for PEM-fuel cells. Electrochem. Acta 49, 1731-1742.

22. Barragán, V. M., Ruíz-Bauzá, Villaluenga J. P. G., and Seoane, B. (2004). Simultaneous electro-osmotic and permeation flows through a Nafion membrane. 1. Aqueous electrolyte solutions. J. Colloid Interf. Sci. 277, 176-183.

23. Pivovar, B. S., Smyrl, W. H., and Cussler, E. L. (2005). Electro-osmosis in Nafion 117, polystyrene sulfonic acid, and polybenzimidazole. J. Electrochem. Soc. 152, A53-A60.

24. Yamanaka, T., Takeguchi, T., Takahashi, H, and Ueda, W. (2009). Water transport during ion conduction in anion-exchange and cation-exchange membranes. J. Electrochem. Soc. 156, B831-B835.
